# Supplementary material
Source: PubMed Central journal article supplement (PMC8547549)
Supplement: NIHMS1666116-supplement-1.pdf [file NIHMS1666116-supplement-1.pdf]

**Bourassa et al., Lower Cardiovascular Reactivity is Associated with More Childhood Adversity and Poorer Midlife Health: Replicated Findings from the Dunedin and MIDUS Cohorts**

**Supplemental Information**

|                               |                                                                                  |   |
|-------------------------------|----------------------------------------------------------------------------------|---|
| <b>Supplemental Figure 1.</b> | Sample Attrition Analysis .....                                                  | 2 |
| <b>Supplemental Table 1.</b>  | Cardiovascular Reactivity Results Separated by Task, Measure, and Cohort .....   | 3 |
| <b>Supplemental Table 2.</b>  | Systolic and Diastolic Blood Pressure Reactivity Associations .....              | 4 |
| <b>Supplemental Table 3.</b>  | Non-linear Associations of Cardiovascular Reactivity with Health .....           | 5 |
| <b>Supplemental Table 4.</b>  | Cardiovascular Reactivity Associations Excluding Outliers .....                  | 6 |
| <b>Supplemental Table 5.</b>  | Assessing Sex Differences .....                                                  | 7 |
| <b>Supplemental Table 6.</b>  | Assessing the Role of Conscientiousness, Depression, and Cognitive Ability ..... | 8 |

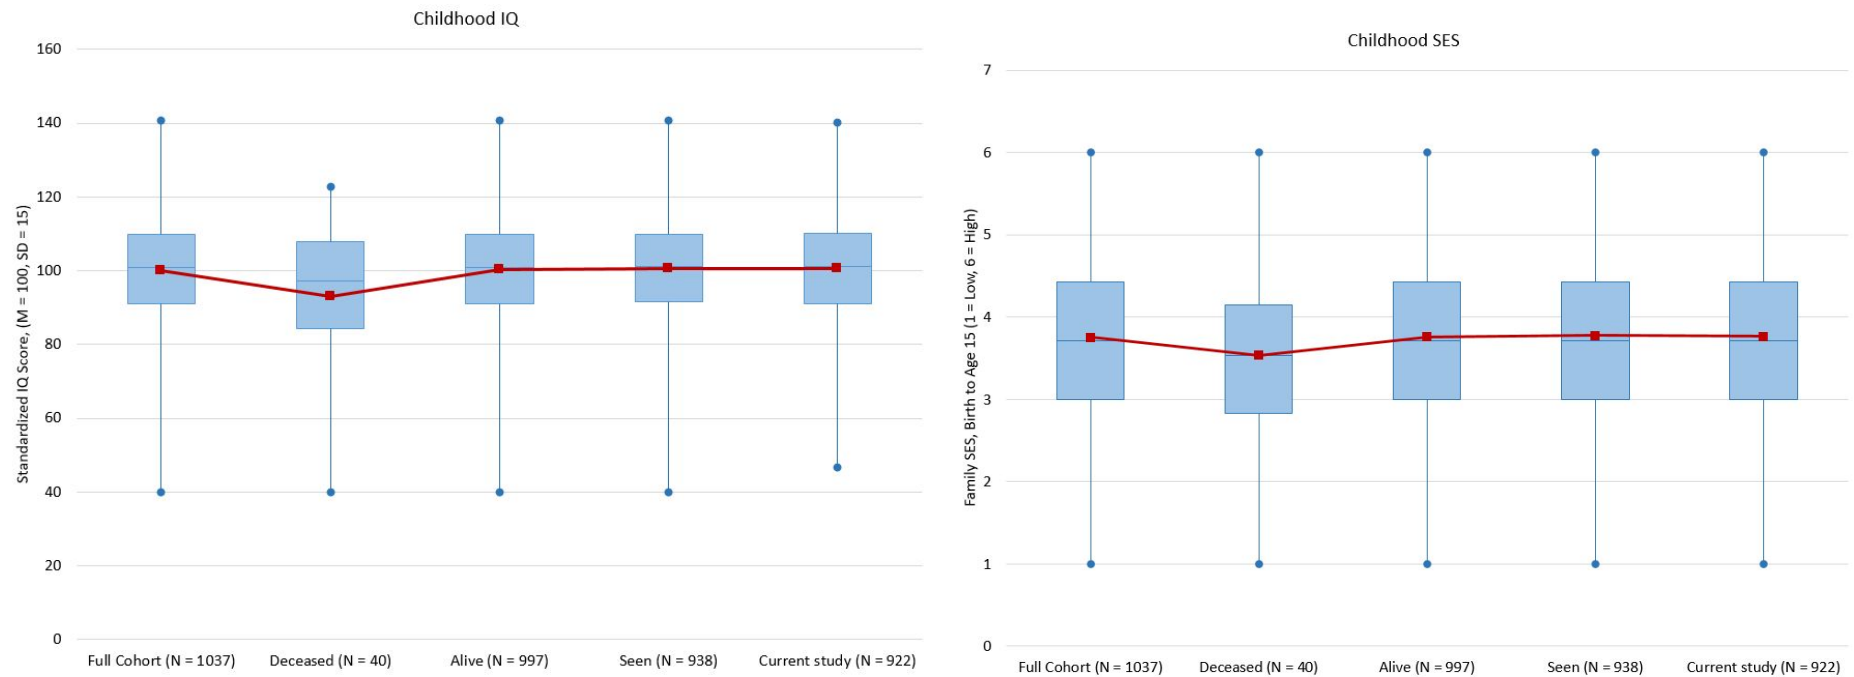

*Supplemental Figure 1.* An attrition analysis was conducted using childhood IQ and SES for the Dunedin cohort to determine whether participants used in the current study were representative of the original cohort. No significant differences in childhood IQ or family SES were found between the full cohort, those still alive, those seen at Phase 45 or those included in the current study.

Supplemental Table 1. Cardiovascular Reactivity Results Separated by Task, Measure, and Cohort

|                         | Dunedin (n = 922)       |                         | MIDUS (n = 1,015)         |                           |
|-------------------------|-------------------------|-------------------------|---------------------------|---------------------------|
|                         | Stroop task             | Mental arithmetic       | Stroop task               | Mental arithmetic         |
| Heart rate reactivity   | 4.9 ± 6.5 [-1.11, 58.0] | 2.1 ± 5.3 [-15.0, 37.0] | 4.0 ± 4.5 [-8.3, 38.0]    | 2.9 ± 3.7 [-9.4, 23.9]    |
| Systolic BP reactivity  | 9.0 ± 7.4 [-16.8, 43.0] | 6.9 ± 6.9 [18.1, 30.9]  | 13.8 ± 12.3 [-35.8, 68.2] | 10.2 ± 11.7 [-33.7, 58.0] |
| Diastolic BP reactivity | 6.2 ± 4.5 [-8.6, 20.1]  | 3.9 ± 4.2 [-12.8, 16.6] | 6.5 ± 4.7 [-15.8, 24.7]   | 5.1 ± 4.7 [-21.9, 21.1]   |

All values represent means, standard deviations, and range for the distributions (Mean ± SD [min, max]). BP = blood pressure. Heart rate was measured in beats per minute. Blood pressure was measured in millimeters mercury.

Supplemental Table 2. *Systolic and Diastolic Blood Pressure Reactivity Associations*

|                               | Dunedin ( <i>n</i> = 922) |                         | MIDUS ( <i>n</i> = 1,015) |                         |
|-------------------------------|---------------------------|-------------------------|---------------------------|-------------------------|
|                               | Systolic BP reactivity    | Diastolic BP reactivity | Systolic BP reactivity    | Diastolic BP reactivity |
| Childhood predictors          |                           |                         |                           |                         |
| Adverse childhood experiences | -0.13* [-0.19, -0.06]     | -0.10* [-0.17, -0.04]   | -0.09* [-0.15, -0.03]     | -0.09* [-0.15, -0.03]   |
| Childhood SES                 | 0.12* [0.06, 0.18]        | 0.07* [0.01, 0.13]      | 0.05 [-0.01, 0.10]        | 0.05 [-0.02, 0.12]      |
| Health outcomes               |                           |                         |                           |                         |
| Self-reported health          | 0.19* [0.13, 0.26]        | 0.14* [0.08, 0.21]      | 0.10* [0.02, 0.17]        | 0.12* [0.05, 0.19]      |
| Inflammation                  | -0.15* [-0.22, -0.08]     | -0.09* [-0.16, -0.02]   | -0.06 [-0.13, 0.00]       | -0.11* [-0.17, -0.04]   |
| Hypertension                  | -0.02 [-0.05, 0.01]       | -0.01 [-0.05, 0.04]     | -0.00 [-0.06, 0.06]       | 0.00 [-0.03, 0.04]      |
| Pace of aging                 | -0.23* [-0.30, -0.17]     | -0.16* [-0.23, -0.10]   | —                         | —                       |
| Mortality                     | —                         | —                       | -0.02 [-0.04, 0.01]       | -0.02 [-0.08, 0.03]     |

Dunedin Longitudinal Study models are adjusted for sex and baseline cardiovascular activity, and MIDUS Study models are adjusted for sex, age, and baseline cardiovascular activity. BP = blood pressure. All statistics are  $\beta$  values except results for hypertension and mortality, which are log survival odds.

\* =  $p < .05$

Supplemental Table 3. *Non-linear Associations of Cardiovascular Reactivity with Health*

|                      | Dunedin ( <i>n</i> = 922) |                     | MIDUS ( <i>n</i> = 1,015) |                     |
|----------------------|---------------------------|---------------------|---------------------------|---------------------|
|                      | HR reactivity             | BP reactivity       | HR reactivity             | BP reactivity       |
| Self-reported health | -0.01 [-0.09, 0.07]       | -0.01 [-0.08, 0.06] | -0.03 [-0.11, 0.05]       | -0.05 [-0.12, 0.02] |
| Inflammation         | -0.03 [-0.13, 0.08]       | 0.04 [-0.04, 0.11]  | -0.08* [-0.15, -0.01]     | 0.06 [-0.01, 0.12]  |
| Hypertension         | 0.01 [-0.06, 0.08]        | 0.11 [-0.01, 0.22]  | -0.04 [-0.105, 0.02]      | 0.04 [-0.09, 0.17]  |
| Pace of aging        | 0.03 [-0.05, 0.11]        | 0.05 [-0.02, -0.12] | —                         | —                   |
| Mortality            | —                         | —                   | -0.05 [-0.25, 0.15]       | 0.06 [-0.04, 0.16]  |

All predictors represent the linear association of the squared standardized variable with each outcome of interest. Dunedin Longitudinal Study models are adjusted for sex, baseline cardiovascular activity, and linear cardiovascular reactivity. MIDUS Study models are adjusted for sex, age, baseline cardiovascular activity, and linear cardiovascular reactivity. HR = heart rate, BP = blood pressure. All statistics are  $\beta$  values except results for hypertension and mortality, which are log survival odds.

\* =  $p < .05$

Supplemental Table 4. *Cardiovascular Reactivity Associations Winsorizing Outliers*

|                               | Dunedin ( <i>n</i> = 922) |                       | MIDUS ( <i>n</i> = 1,015) |                       |
|-------------------------------|---------------------------|-----------------------|---------------------------|-----------------------|
|                               | HR reactivity             | BP reactivity         | HR reactivity             | BP reactivity         |
| Childhood predictors          |                           |                       |                           |                       |
| Adverse childhood experiences | -0.16* [-0.22, -0.10]     | -0.12* [-0.18, -0.06] | -0.07* [-0.14, -0.01]     | -0.11* [-0.17, -0.05] |
| Childhood SES                 | 0.09* [0.03, 0.16]        | 0.10* [0.04, 0.17]    | 0.03 [-0.04, 0.10]        | 0.06 [-0.01, 0.13]    |
| Health outcomes               |                           |                       |                           |                       |
| Self-reported health          | 0.10* [0.04, 0.17]        | 0.19* [0.12, 0.26]    | 0.11* [0.04, 0.18]        | 0.14* [0.06, 0.20]    |
| Inflammation                  | -0.08* [-0.15, -0.01]     | -0.13* [-0.20, -0.06] | -0.05 [-0.12, 0.01]       | -0.09* [-0.15, -0.02] |
| Hypertension                  | -0.00 [-0.04, 0.03]       | -0.03 [-0.07, 0.01]   | 0.09* [0.04, 0.13]        | -0.02 [-0.06, 0.02]   |
| Pace of aging                 | -0.17* [-0.24, -0.11]     | -0.22* [-0.28, -0.15] | —                         | —                     |
| Mortality                     | —                         | —                     | -0.09* [-0.18, -0.00]     | -0.04 [-0.08, 0.01]   |

Dunedin Longitudinal Study models are adjusted for sex and baseline cardiovascular activity, and MIDUS Study models are adjusted for sex, age, and baseline cardiovascular activity. BP = blood pressure. All statistics are  $\beta$  values except results for hypertension and mortality, which are log survival odds.

\* =  $p < .05$

Supplemental Table 5. *Assessing Sex Differences*

|                      | Dunedin ( <i>n</i> = 922) |                     | MIDUS ( <i>n</i> = 1,015) |                     |
|----------------------|---------------------------|---------------------|---------------------------|---------------------|
|                      | HR reactivity             | BP reactivity       | HR reactivity             | BP reactivity       |
| ACEs                 | 0.02 [-0.09, 0.12]        | -0.10 [-0.21, 0.00] | -0.01 [-0.18, 0.16]       | -0.03 [-0.23, 0.19] |
| Childhood SES        | -0.08 [-0.31, 0.15]       | -0.03 [-0.26, 0.20] | 0.04 [-0.17, 0.25]        | 0.03 [-0.19, 0.24]  |
| Self-reported health | 0.05 [-0.05, 0.15]        | 0.02 [-0.13, 0.16]  | 0.09 [-0.03, 0.20]        | 0.06 [-0.07, 0.19]  |
| Inflammation         | 0.04 [-0.07, 0.15]        | -0.02 [-0.17, 0.14] | 0.04 [-0.07, 0.14]        | 0.11 [-0.01, 0.23]  |
| Hypertensive status† | 0.03 [-0.02, 0.09]        | 0.01 [-0.06, 0.08]  | 0.02 [-0.05, 0.09]        | 0.02 [-0.05, 0.09]  |
| Pace of aging        | 0.03 [-0.07, 0.13]        | 0.07 [-0.08, 0.21]  | —                         | —                   |
| Mortality†           | —                         | —                   | 0.13 [-0.03, 0.30]        | 0.08* [0.01, 0.15]  |

Dunedin Longitudinal Study models are adjusted for sex and baseline cardiovascular activity, and MIDUS Study models are adjusted for sex, age, and baseline cardiovascular activity. BP = blood pressure. All statistics are  $\beta$  values except results for hypertension and mortality, which are log survival odds. Sex is coded as 0 = women, 1 = men.

\* =  $p < .05$

Supplemental Table 6. *Assessing the Role of Conscientiousness, Depression, and Cognitive Ability*

|                                     | Dunedin ( <i>n</i> = 922) |               | MIDUS ( <i>n</i> = 1,015) |               |
|-------------------------------------|---------------------------|---------------|---------------------------|---------------|
|                                     | HR reactivity             | BP reactivity | HR reactivity             | BP reactivity |
| Adverse childhood experiences       |                           |               |                           |               |
| Unadjusted                          | -0.16*                    | -0.12*        | -0.08*                    | -0.11*        |
| Controlling for conscientiousness   | -0.14*                    | -0.10*        | -0.08*                    | -0.09*        |
| Controlling for cognitive ability   | -0.12*                    | -0.07*        | -0.07*                    | -0.09*        |
| Controlling for depressive symptoms | -0.15*                    | -0.10*        | -0.05                     | -0.04         |
| Controlling for all                 | -0.11*                    | -0.04         | -0.03                     | -0.03         |
| Childhood SES                       |                           |               |                           |               |
| Unadjusted                          | 0.12*                     | 0.10*         | 0.03                      | 0.06          |
| Controlling for conscientiousness   | 0.11*                     | 0.09*         | 0.03                      | 0.06          |
| Controlling for cognitive ability   | 0.05                      | 0.00          | 0.00                      | 0.04          |
| Controlling for depressive symptoms | 0.11                      | 0.09          | 0.02                      | 0.05          |
| Controlling for all                 | 0.05                      | -0.00         | -0.00                     | 0.03          |
| Self-reported health                |                           |               |                           |               |
| Unadjusted                          | 0.10*                     | 0.19*         | 0.10*                     | 0.13*         |
| Controlling for conscientiousness   | 0.07*                     | 0.15*         | 0.10*                     | 0.12*         |
| Controlling for cognitive ability   | 0.07*                     | 0.14*         | 0.08*                     | 0.11*         |
| Controlling for depressive symptoms | 0.09*                     | 0.17*         | 0.06                      | 0.08*         |
| Controlling for all                 | 0.04                      | 0.10*         | 0.04                      | 0.05          |
| Inflammation                        |                           |               |                           |               |
| Unadjusted                          | -0.09*                    | -0.13*        | -0.06*                    | -0.09*        |
| Controlling for conscientiousness   | -0.07                     | -0.11*        | -0.06                     | -0.08*        |
| Controlling for cognitive ability   | -0.06                     | -0.10*        | -0.05                     | -0.07*        |
| Controlling for depressive symptoms | -0.08                     | -0.13*        | -0.06                     | -0.08*        |
| Controlling for all                 | -0.05                     | -0.08*        | -0.05                     | -0.06         |
| Hypertension                        |                           |               |                           |               |
| Unadjusted                          | -0.00                     | -0.02         | 0.07*                     | -0.02         |
| Controlling for conscientiousness   | 0.00                      | -0.01         | 0.08*                     | -0.01         |
| Controlling for cognitive ability   | 0.00                      | -0.02         | 0.08*                     | -0.02         |
| Controlling for depressive symptoms | -0.00                     | -0.02         | 0.07*                     | -0.02         |
| Controlling for all                 | 0.01                      | -0.00         | 0.08*                     | -0.02         |
| Pace of aging                       |                           |               |                           |               |
| Unadjusted                          | -0.17*                    | -0.22*        | —                         | —             |
| Controlling for conscientiousness   | -0.14*                    | -0.17*        | —                         | —             |
| Controlling for cognitive ability   | -0.11*                    | -0.14*        | —                         | —             |
| Controlling for depressive symptoms | -0.16*                    | -0.20*        | —                         | —             |
| Controlling for all                 | -0.08*                    | -0.10*        | —                         | —             |
| Mortality                           |                           |               |                           |               |



|                                     |   |   |        |       |
|-------------------------------------|---|---|--------|-------|
| Unadjusted                          | — | — | -0.08* | -0.03 |
| Controlling for conscientiousness   | — | — | -0.07  | -0.02 |
| Controlling for cognitive ability   | — | — | -0.07  | -0.03 |
| Controlling for depressive symptoms | — | — | -0.06  | -0.01 |
| Controlling for all                 | — | — | -0.04  | -0.01 |

Models using Dunedin Longitudinal Study data are adjusted for sex and baseline cardiovascular activity, and models using MIDUS Study data are adjusted for sex, age, and baseline cardiovascular activity. HR = heart rate, BP = blood pressure. All statistics are  $\beta$  values except results for hypertension and mortality, which are log survival odds. Mortality analyses excluded participants with missing predictor data.

\* =  $p < .05$
